# Supplementary material
Source: Research Square preprint supplement (doi:10.21203/rs.3.rs-9623444/v1)
Supplement: Supplementary file 1 [file 169b64fe00c5077039a10012.pdf]

## 1 **Supplement files**

### 2 **Characteristic of DENV serotype, clinical manifestation, and laboratory parameters**

3 The clinical manifestations and laboratory parameters associated with each DENV serotype.  
4 Among clinical symptoms, myalgia showed a significant increase in DENV-1 ( $n = 87$ , 88.8%)  
5 ( $p < 0.001$ ). We found that the bleeding signs (gum bleeding, vaginal bleeding, epistaxis, blood  
6 in stool, and blood in vomit) were more frequently observed in DENV-2 than DENV-1,  
7 although the difference was not significant ( $p = 0.053$ ). In contrast, the RBC count was slightly  
8 higher in DENV-1 than DENV-2 ( $p = 0.058$ ). These results suggested that DENV-2 may be  
9 associated with a higher risk of developing severe disease compared to DENV-1 (Table S1).

10

### 11 **Clinical features and laboratory parameters in primary and secondary infections**

12 Most symptoms were significantly more frequent in secondary than primary DENV infection:  
13 fever ( $n = 397$ , 90.8%) ( $p = 0.047$ ); myalgia ( $n = 377$ , 86.3%) ( $p = 0.0002$ ); headache ( $n = 375$ ,  
14 85.9%) ( $p < 0.0001$ ); nausea/vomiting ( $n = 155$ , 35.5%) ( $p = 0.014$ ); arthralgia ( $n = 194$ , 44.4%)  
15 ( $p < 0.0001$ ); tourniquet test ( $n = 219$ , 50.1%) ( $p = 0.010$ ); rash ( $n = 126$ , 28.8%) ( $p = 0.005$ );  
16 sign of bleeding ( $n = 79$ , 18%) ( $p = 0.004$ ); and abdominal pain ( $n = 69$ , 15.8%) ( $p = 0.0003$ ).  
17 However, coma or shock and hepatomegaly were not different between groups. Together with  
18 laboratory parameters, the median platelet count was significantly lower in secondary infection  
19 (91, IQR = 53-151) ( $p = 0.0004$ ).

20

21

22

23

24

25

26

27 **Table S1: Differences in the Association of Clinical and Laboratory Parameters with Serotypes**

| Characteristic                  | DENV-1 |              | DENV-2  |             | p-value |
|---------------------------------|--------|--------------|---------|-------------|---------|
|                                 | n = 98 |              | n = 120 |             |         |
|                                 | n      | (%)          | n       | (%)         |         |
| Fever                           | 98     | (100)        | 115     | (95.8)      | 0.066   |
| Myalgia                         | 87     | (88.8)       | 88      | (73.3)      | 0.005   |
| Headache                        | 85     | (86.7)       | 113     | (94.2)      | 0.064   |
| Nausea/vomiting                 | 22     | (22.5)       | 26      | (21.7)      | >0.99   |
| Arthralgia                      | 20     | (20.4)       | 35      | (29.2)      | 0.159   |
| Tourniquet test                 | 39     | (39.8)       | 53      | (44.2)      | 0.581   |
| Rash                            | 23     | (23.5)       | 37      | (30.8)      | 0.286   |
| Sign of bleeding*               | 7      | (7.1)        | 18      | (15)        | 0.053   |
| Abdominal pain                  | 6      | (6.1)        | 16      | (13.3)      | 0.112   |
| Coma/Shock                      | 2      | (2)          | 8       | (6.7)       | 0.106   |
| Hepatomegaly                    | 7      | (7.1)        | 16      | (13.3)      | 0.184   |
| Laboratory parameter            | Median | (IQR)        | Median  | (IQR)       | p-value |
| WBC Count (10 <sup>9</sup> /L)  | 3.5    | (2.5-4.8)    | 4       | (2.8-6.3)   | 0.090   |
| RBC Count (10 <sup>12</sup> /L) | 5.6    | (4.9-6.1)    | 5       | (4.3-5.3)   | 0.058   |
| Hematocrit (%)                  | 39.5   | (35.2-41.9)  | 39.5    | (35.3-43.9) | 0.912   |
| PLT Count (10 <sup>9</sup> /L)  | 135    | (94.5-187.3) | 110     | (49-161)    | 0.098   |

28

29 Abbreviations: WBC, white blood cell; RBC, red blood cell; PLT, platelet; AST, aspartate aminotransferase.

30 \*Signs of bleeding, including gum bleeding, vaginal bleeding, epistaxis, blood in stool, and blood in vomit. Data  
 31 are n (%) or/and median (IQR).

32

33

34

35

| Clinical features               | Total (n = 615) |              | Primary (n = 178) |                | Secondary (n = 437) |                | p-value |
|---------------------------------|-----------------|--------------|-------------------|----------------|---------------------|----------------|---------|
|                                 | n               | (%)          | n                 | (%)            | n                   | (%)            |         |
| Fever                           | 514             | (83.6)       | 152               | (85.4)         | 397                 | (90.8)         | 0.047   |
| Myalgia                         | 508             | (82.6)       | 131               | (73.6)         | 377                 | (86.3)         | 0.0002  |
| Headache                        | 471             | (76.6)       | 124               | (69.7)         | 375                 | (85.8)         | <0.0001 |
| Nausea/vomiting                 | 200             | (32.5)       | 45                | (25.3)         | 155                 | (35.5)         | 0.014   |
| Arthralgia                      | 226             | (36.7)       | 32                | (18)           | 194                 | (44.4)         | <0.0001 |
| Tourniquet test                 | 288             | (46.8)       | 69                | (38.8)         | 219                 | (50.1)         | 0.010   |
| Rash                            | 158             | (25.7)       | 32                | (18)           | 126                 | (28.8)         | 0.005   |
| Sign of bleeding*               | 95              | (15.4)       | 16                | (9)            | 79                  | (18)           | 0.004   |
| Abdominal pain                  | 78              | (12.7)       | 9                 | (5)            | 69                  | (15.8)         | 0.0003  |
| Coma/Shock                      | 20              | (3.3)        | 7                 | (3.9)          | 13                  | (3)            | 0.543   |
| Hepatomegaly                    | 58              | (9.4)        | 14                | (7.9)          | 44                  | (10)           | 0.396   |
| Laboratory results              | n               | Med (IQR)    | n                 | Med (IQR)      | n                   | Med (IQR)      | p-value |
| WBC Count (10 <sup>9</sup> /L)  | 206             | 3.5 (2.4-5)  | 53                | 3.6 (2.5-5.6)  | 153                 | 3.5 (2.3-4.9)  | 0.362   |
| Lymphocyte (%)                  | 92              | 25 (17.8-35) | 17                | 28.5 (13-35.4) | 75                  | 24.8 (19.2-35) | 0.855   |
| Neutrophil (%)                  | 27              | 59 (53-71)   | 7                 | 59 (53.4-86.5) | 20                  | 59 (51.75-70)  | 0.423   |
| RBC Count (10 <sup>12</sup> /L) | 94              | 5 (4.5-5.8)  | 18                | 5 (4.7-5.9)    | 76                  | 5 (4.4-5.7)    | 0.828   |
| Hemoglobin (g/dl)               | 96              | 13 (11.7-15) | 19                | 13.3 (11.7-15) | 77                  | 13 (11.7-14.8) | 0.636   |
| Hematocrit (%)                  | 203             | 39.5 (35-44) | 53                | 39.5 (35-43)   | 150                 | 39.4 (32.2-44) | 0.783   |
| PLT Count (10 <sup>9</sup> /L)  | 199             | 108 (59-155) | 52                | 130 (85.5-174) | 147                 | 91 (53-151)    | 0.0004  |
| Creatinine (mg/dl)              | 48              | 0.9 (0.7-1)  | 9                 | 1 (0.7-1)      | 39                  | 0.9 (0.7-1.1)  | 0.672   |

37 **Table S2: Clinical features and laboratory parameters in primary and secondary infection**

38

39 Abbreviations: WBC, white blood cell; RBC, red blood cell; PLT, platelet; AST, aspartate aminotransferase.

40 \*Signs of bleeding, including gum bleeding, vaginal bleeding, epistaxis, blood in stool, and blood in vomit. Data  
41 are n (%) or/and median (IQR).

42
